# Supplementary material for: Antagonism of interferon signaling by fibroblast growth factors promotes viral replication
Source: PubMed Central journal article supplement (PMC7507082; doi:10.15252/emmm.201911793), 2020-07-27
Supplement: EMMM-12-e11793-s002.pdf [file EMMM-12-e11793-s002.pdf]

## Expanded View Figures

## A HaCaT cells

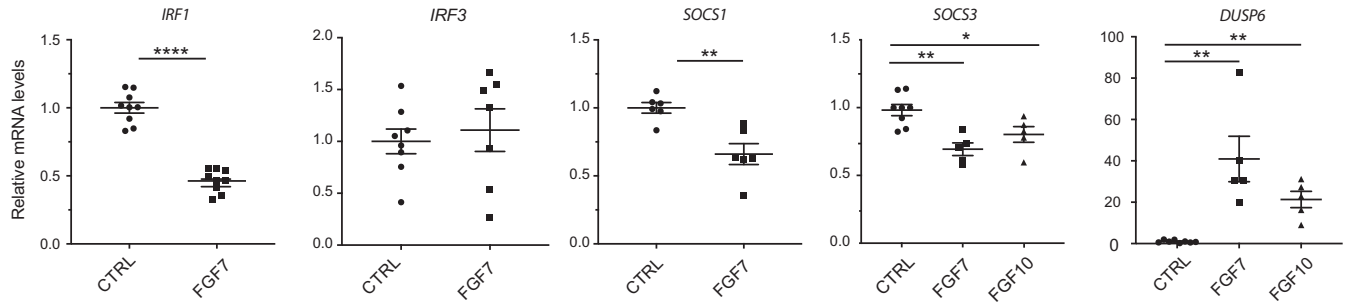

## B Caco-2 cells

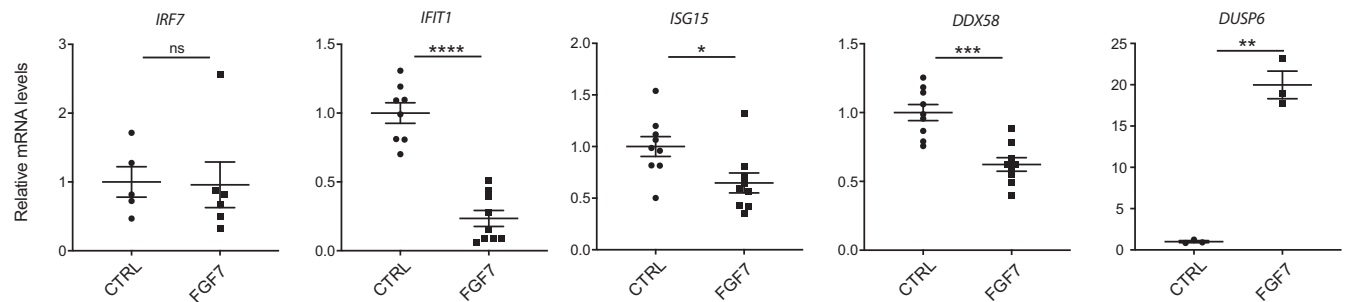

**Figure EV1. FGF signaling suppresses ISG expression in HaCaT keratinocytes and Caco-2 colon cancer cells.**

A Serum-starved HaCaT keratinocytes were treated for 16 h with FGF7 or FGF10 (10 ng/ml each). RNA samples were analyzed by qRT-PCR for *IRF1*, *IRF3*, *SOCS1*, *SOCS3*, and *DUSP6* relative to *RPLP0*.

B Serum-starved Caco-2 cells were treated for 6 h with FGF7 (10 ng/ml). RNA samples were analyzed by qRT-PCR for *IRF7*, *IFIT1*, *ISG15*, *DDX58*, or *DUSP6* relative to *RPLP0*.

Data information: Scatter plots show mean  $\pm$  SEM. Mean expression levels in CTRL cell cultures were set to 1. (A)  $N = 5-9$  from 2 to 3 experiments, (B)  $N = 5-8$  from 3 experiments for ISGs,  $N = 3$  from 1 experiment for *DUSP6*. ns: non-significant,  $*P \leq 0.05$ ,  $**P \leq 0.01$ ,  $***P \leq 0.001$ ,  $****P < 0.0001$  (Mann-Whitney *U*-test). Exact *P*-values are provided in Dataset EV2.

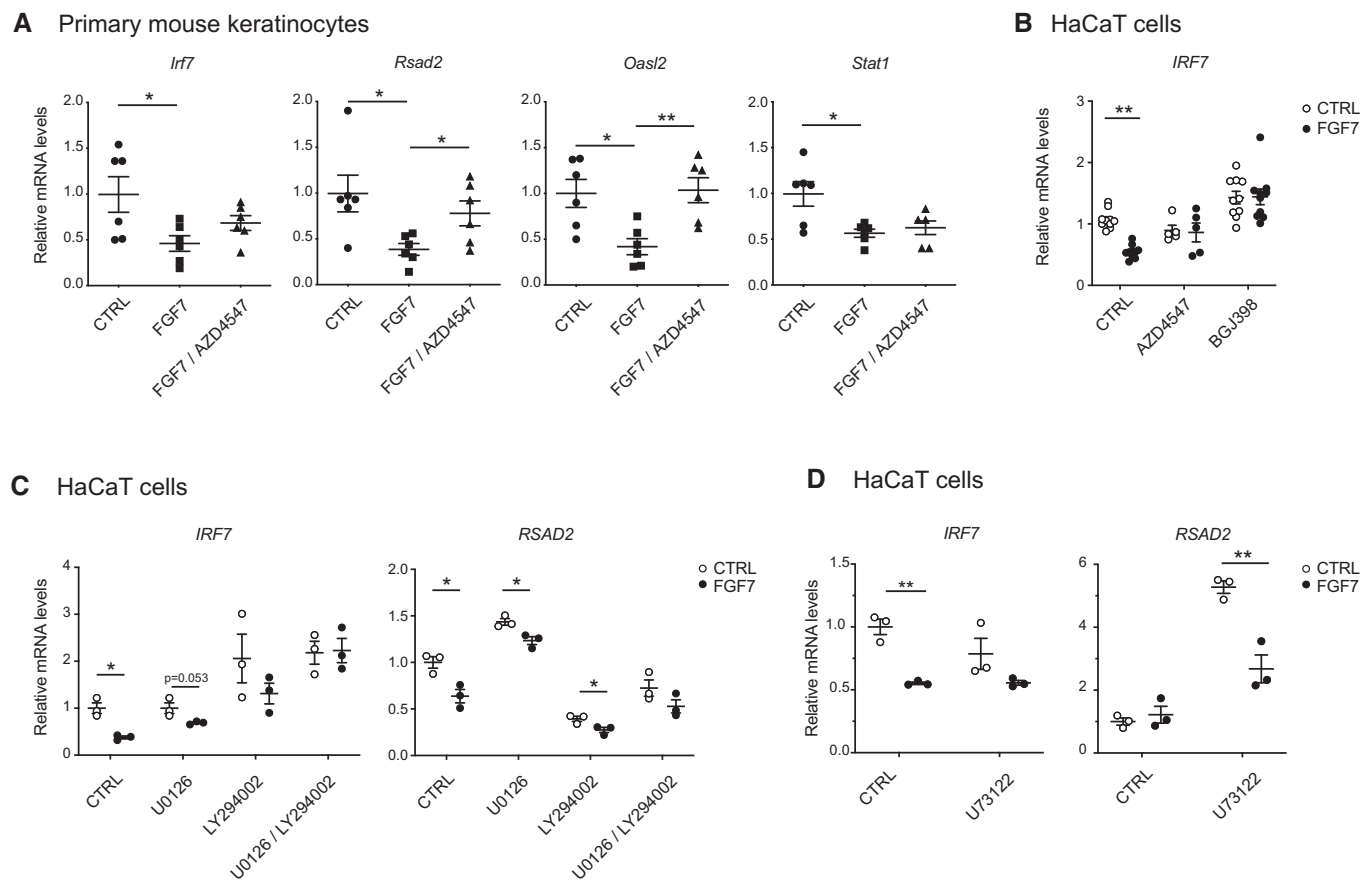

**Figure EV2. FGF7 suppresses ISG expression in keratinocytes via FGFR-mediated MEK1/2-ERK1/2 and PI3K-AKT signaling.**

- A Growth factor-starved primary mouse keratinocytes were treated for 6 h with FGF7 (10 ng/ml) in the presence or absence of the FGFR kinase inhibitor AZD4547 (1  $\mu$ M) (added 3 h prior to FGF7). RNA samples were analyzed by qRT-PCR for expression of *Ifi7*, *Rsad2*, *Oas12*, and *Stat1* relative to *Rps29*.
- B Serum-starved HaCaT cells were treated for 6 h with FGF7 (10 ng/ml) in the absence or presence of the FGFR kinase inhibitors AZD4547 (1  $\mu$ M) or BGJ398 (3.5  $\mu$ M) (added 2 h prior to FGF7) and analyzed by qRT-PCR for *IRF7* relative to *RPLPO*.
- C, D Serum-starved HaCaT keratinocytes were treated for 6 h with FGF7 (10 ng/ml) in the absence or presence of the PI3K inhibitor LY294002 (5  $\mu$ M) and/or the MEK1/2 inhibitor U0126 (10  $\mu$ M) (C) or the PLC- $\gamma$  inhibitor U73122 (5  $\mu$ M) (D) (added 2 h prior to FGF7) and analyzed by qRT-PCR for *IRF7* and *RSAD2* relative to *RPLPO*.

Data information: Scatter plots show mean  $\pm$  SEM. Mean expression levels in CTRL cell cultures were set to 1. (A)  $N = 5-6$  from 2 experiments, (B)  $N = 5-10$  from 4 experiments. (C, D) Representative experiments from at least two independent experiments are shown,  $N = 3$  per experiment. \* $P \leq 0.05$ , \*\* $P \leq 0.01$  (Mann-Whitney  $U$ -test (A, B) and  $t$ -test with Welch correction for assessment of FGF7 effect (C, D). Exact  $P$ -values are provided in Dataset EV2.

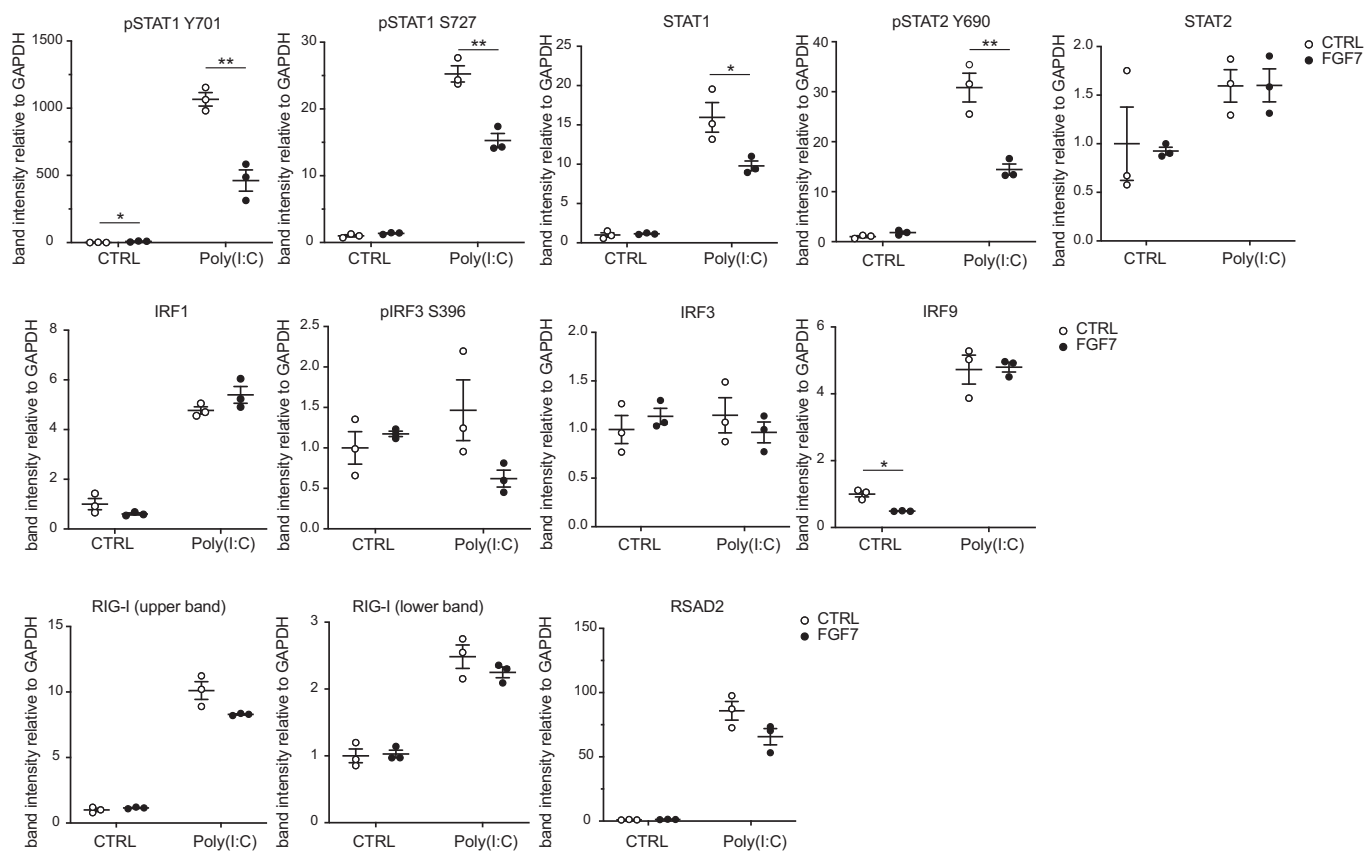

**Figure EV3. FGF7 suppresses ISG expression and poly(I:C)-induced STAT1 and STAT2 activation.**

Quantification of the Western blot data shown in Fig 4B. Band intensities (based on densitometry) were normalized to the intensities of the GAPDH bands. Scatter plots show mean  $\pm$  SEM ( $N = 3$ ). Mean band intensity in the CTRL cell cultures was set to 1. \* $P \leq 0.05$ , \*\* $P \leq 0.01$  (t-test with Welch correction for assessment of FGF7 effect). Exact  $P$ -values are provided in Dataset EV2.
