# Supplementary material for: Antagonism of interferon signaling by fibroblast growth factors promotes viral replication
Source: PubMed Central journal article supplement (PMC7507082; doi:10.15252/emmm.201911793), 2020-07-27

**Figure 1G**

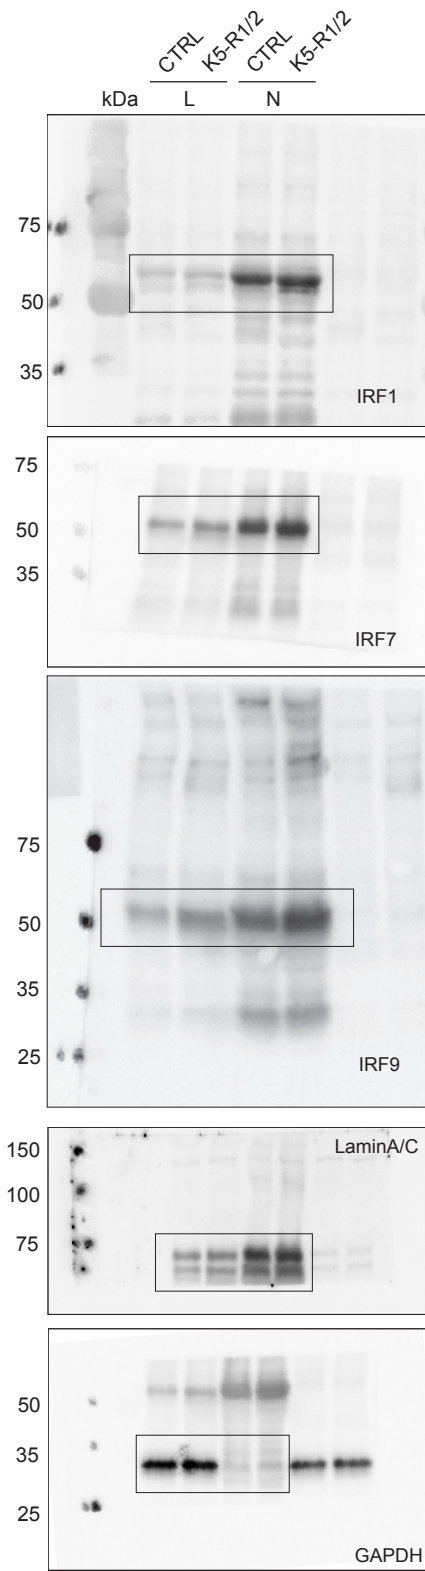

Supplement: EMMM-12-e11793-s005.pdf [file EMMM-12-e11793-s005.pdf]
