# Supplementary material for: Antagonism of interferon signaling by fibroblast growth factors promotes viral replication
Source: PubMed Central journal article supplement (PMC7507082; doi:10.15252/emmm.201911793), 2020-07-27

**FIGURE 3C**

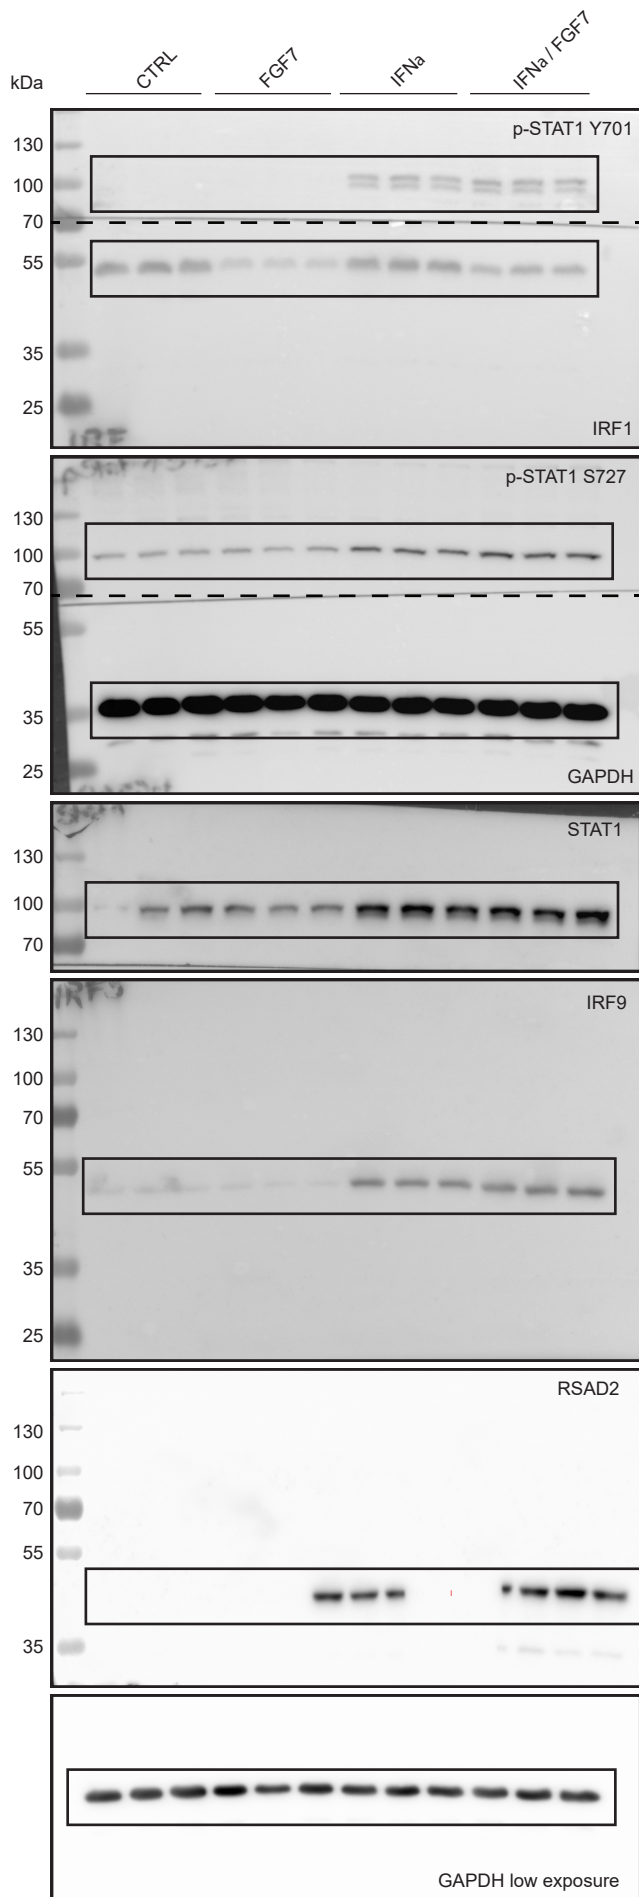

Supplement: EMMM-12-e11793-s007.pdf [file EMMM-12-e11793-s007.pdf]
